# Supplementary material
Source: PubMed Central journal article supplement (PMC8903027)
Supplement: NIHMS1782199-supplement-Supplementary_Table_1.pdf [file NIHMS1782199-supplement-Supplementary_Table_1.pdf]

**Supplementary Table 1 | Selected ongoing clinical trials of next-generation thalidomide analogues**

| Agent               | Disease                                                          | Treatment approach                                                                                                                             | Study phase  | ClinicalTrials.gov identifier |
|---------------------|------------------------------------------------------------------|------------------------------------------------------------------------------------------------------------------------------------------------|--------------|-------------------------------|
| CC-90009            | R/R high-risk MDS or R/R AML                                     | Single agent                                                                                                                                   | Phase I      | NCT02848001                   |
|                     | Newly diagnosed or R/R AML                                       | In combination with venetoclax (BCL2 inhibitor) and azacitidine (HMA) or with gilteritinib (FLT3 inhibitor)                                    | Phase I/II   | NCT04336982                   |
| Avadomide (CC-122)  | Advanced-stage melanoma (naive or refractory to PD-1 inhibition) | In combination with nivolumab (anti-PD-1 antibody)                                                                                             | Phase II     | NCT03834623                   |
|                     | Advanced-stage HCC (after one prior line of therapy)             | In combination with nivolumab                                                                                                                  | Phase I/II   | NCT02859324                   |
|                     | Newly diagnosed DLBCL with poor-risk factors                     | In combination with R-CHOP chemotherapy                                                                                                        | Phase I      | NCT03283202                   |
|                     | Treatment-naive or R/R CLL or SLL                                | Single-agent, or in combination with ibrutinib (BTK inhibitor) or obinutuzumab (anti-CD20 antibody)                                            | Phase I/II   | NCT02406742                   |
|                     | R/R DLBCL or R/R FL (naive or refractory to lenalidomide)        | In combination with obinutuzumab                                                                                                               | Phase Ib     | NCT02417285                   |
|                     | R/R DLBCL or R/R FL (naive or refractory to lenalidomide)        | In combination with rituximab (anti-CD20 antibody) and/or either onasertib (CC-223; mTOR inhibitor) or spebrutinib (CC-292; BTK inhibitor)     | Phase Ib     | NCT02031419                   |
|                     | R/R B cell malignancies                                          | In combination with JCAR017 (autologous anti-CD19 4-1BB CAR T cell product)                                                                    | Phase I/II   | NCT03310619                   |
|                     | R/R advanced-stage solid tumours, NHL or MM                      | Single agent                                                                                                                                   | Phase I      | NCT01421524                   |
|                     | Advanced-stage solid tumours or NHL                              | Single agent                                                                                                                                   | Phase I      | NCT02509039                   |
| Iberdomide (CC-220) | R/R MM                                                           | Single agent, or in combination with daratumumab (anti-CD38 antibody), bortezomib (PI), carfilzomib (PI) and/or dexamethasone (corticosteroid) | Phase Ib/IIa | NCT02773030                   |
|                     | R/R MM                                                           | In combination with low-dose cyclophosphamide (chemotherapy) and dexamethasone                                                                 | Phase II     | NCT04392037                   |
|                     | Newly diagnosed MM                                               | Single-agent maintenance after ASCT                                                                                                            | Phase II     | NCT04564703                   |
|                     | R/R lymphomas                                                    | Single agent, or in combination with rituximab or obinutuzumab                                                                                 | Phase I/II   | NCT04464798                   |
|                     | R/R B cell malignancies                                          | In combination with JCAR017 (autologous anti-CD19 4-1BB CAR T cell product)                                                                    | Phase I/II   | NCT03310619                   |
| CC-92480            | R/R MM                                                           | Single agent, in combination with dexamethasone                                                                                                | Phase I      | NCT03374085                   |
|                     | Newly diagnosed or R/R MM                                        | In combination with dexamethasone plus either daratumumab, bortezomib or carfilzomib                                                           | Phase I/II   | NCT03989414                   |

Trials involving patients with cancer and noted as being 'not yet recruiting', 'active, not yet recruiting', 'recruiting' or 'completed' with no results posted were retrieved from the ClinicalTrials.gov database. AML, acute myeloid leukaemia; ASCT, autologous haematopoietic stem cell transplantation; CLL, chronic lymphocytic leukaemia; DLBCL, diffuse large B cell lymphoma; FL, follicular lymphoma; HCC, hepatocellular carcinoma; HMA, hypomethylating agent; MDS, myelodysplastic syndrome; MM, multiple myeloma; NHL, non-Hodgkin lymphoma; PI, proteasome inhibitor; R-CHOP, rituximab, cyclophosphamide, doxorubicin, vincristine and prednisone; R/R, relapsed and/or refractory; SLL, small lymphocytic leukaemia.
